# Supplementary material for: Whispering gallery mode emission from dye-doped polymer fiber cross-sections fabricated by near-field electrospinning
Source: Royal Society of Chemistry journal article supplement (doi:10.1039/d0nr00147c), 2020-01-01
Supplement: d0nr00147c1.pdf [file d0nr00147c1.pdf]

## ELECTRONIC SUPPLEMENTARY INFORMATION

# Whispering Gallery Mode Emission from Dye-Doped Polymer Fiber Cross-sections Fabricated by Near-Field Electrospinning

Joseph E. Cheeney,<sup>†,‡</sup> Stephen T. Hsieh,<sup>†,‡</sup> Nosang V. Myung,<sup>§</sup> and Elaine D. Haberer<sup>\*,†,||</sup>

<sup>†</sup>Materials Science and Engineering Program, University of California, Riverside, CA 92521

<sup>§</sup>Department of Chemical and Environmental Engineering, University of California, Riverside, CA 92521

<sup>||</sup>Department of Electrical and Computer Engineering, University of California, Riverside, CA 92521

\*Corresponding Author: [haberer@ucr.edu](mailto:haberer@ucr.edu)

<sup>‡</sup>Indicates equal contribution

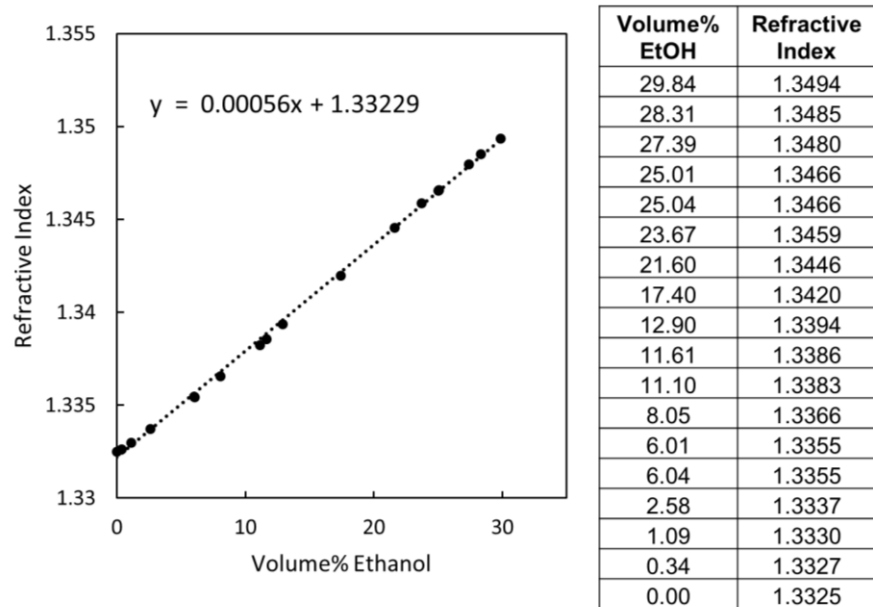

Figure S1: A plot of data and table of values which were obtained from Scott et al<sup>1</sup>, and used to calculate the refractive indices of ethanol-water solutions used for sensing experiments.

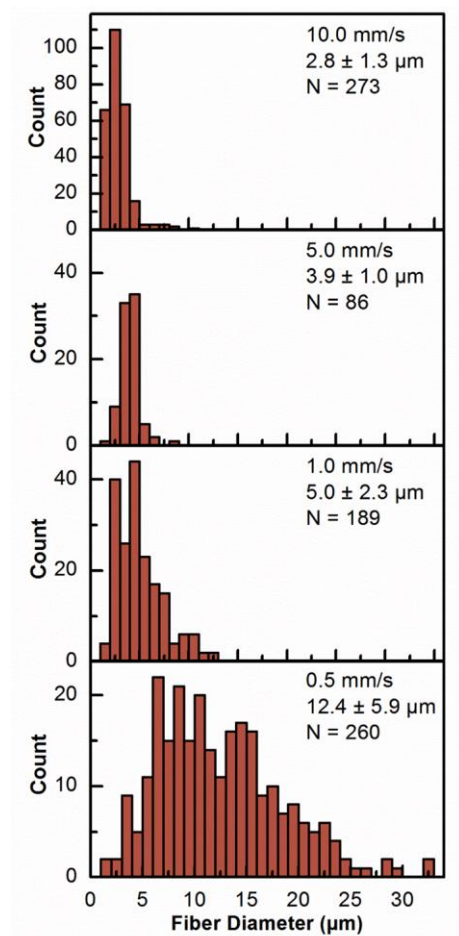

Figure S2: Histograms of 0.0035 gR6G/gPVA fiber size electrospun using stage speeds of 10.0 mm/s, 5.0 mm/s, 1.0 mm/s, and 0.5 mm/s.

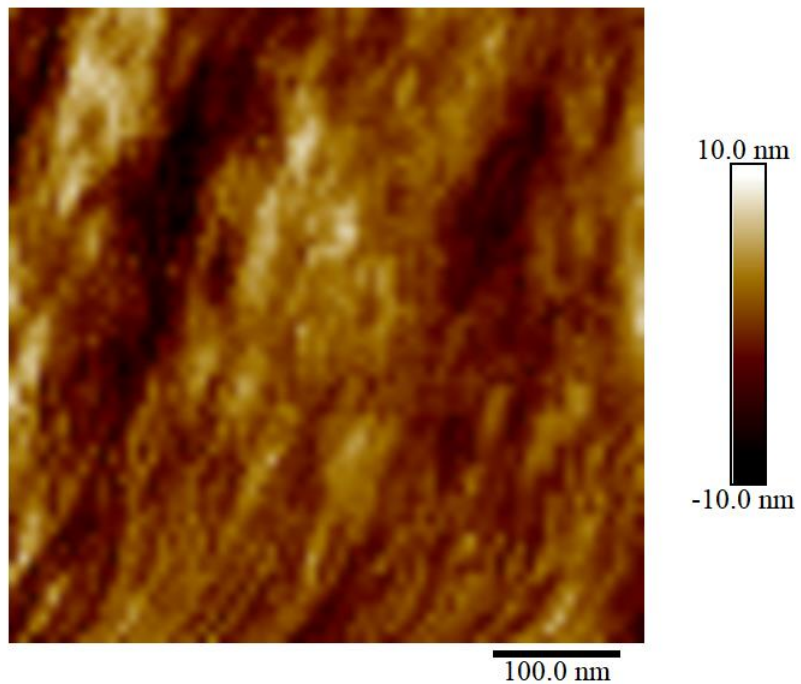

Figure S3: AFM image of the surface of a dye-doped PVA fiber electrospun with a stage speed of  $0.5 \text{ mm s}^{-1}$  and a R6G/PVA mass ratio of 0.0035. The measured root-mean-squared roughness was 2.4 nm.

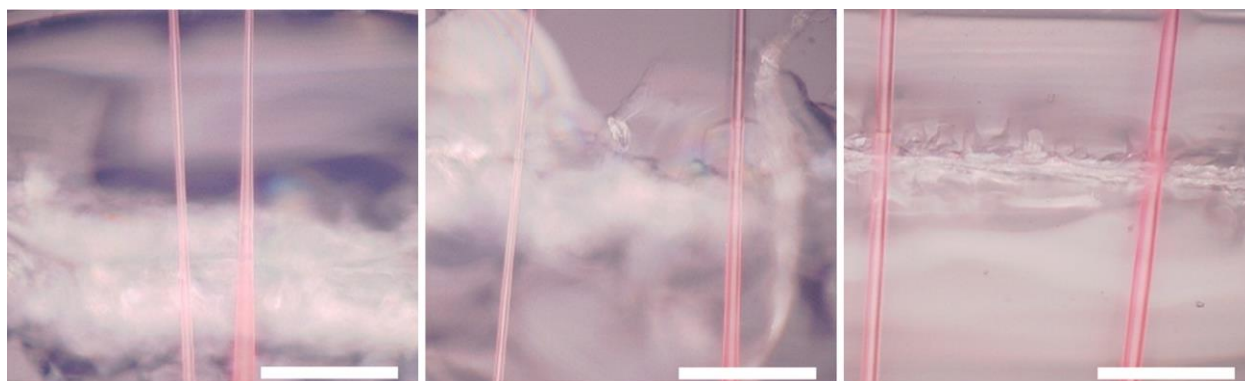

Figure S4: Optical microscopy images illustrating the range and degree of diameter variation observed in dye-doped, electrospun PVA fibers on a glass substrate. Background depicts the scribed trench over which the fibers were suspended. Scale bar: 100  $\mu\text{m}$ .

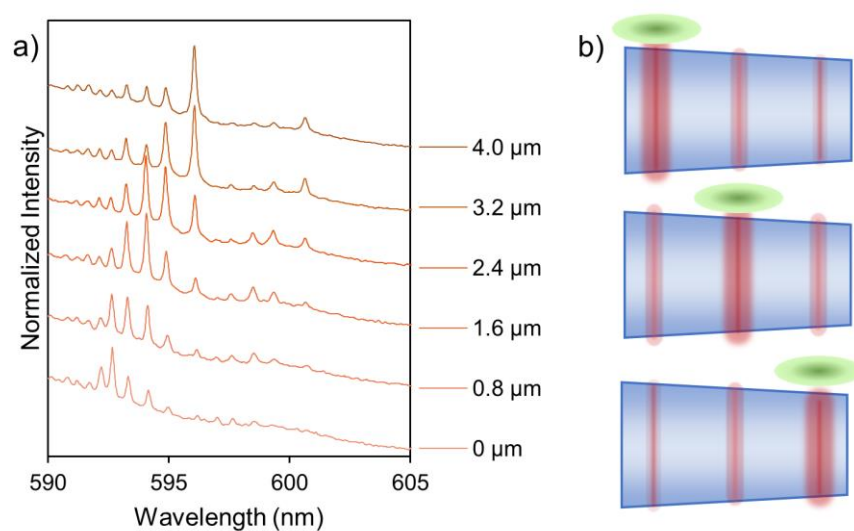

Figure S5: a) Spectra taken at 0.8  $\mu\text{m}$  increments along the length of a 4.2  $\mu\text{m}$  diameter fiber. b) A schematic representation of spectral measurements at three different axial positions along the length of the fiber.

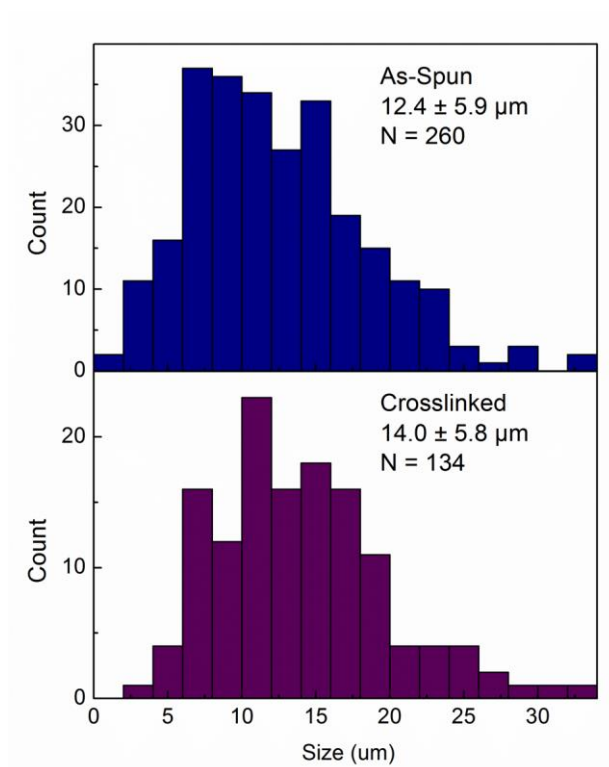

Figure S6: Histogram of as-spun and crosslinked R6G-PVA fiber size electrospun using a stage speed of 0.5 mm/s. A small increase in fiber diameter was caused by glutaraldehyde crosslinking treatment.

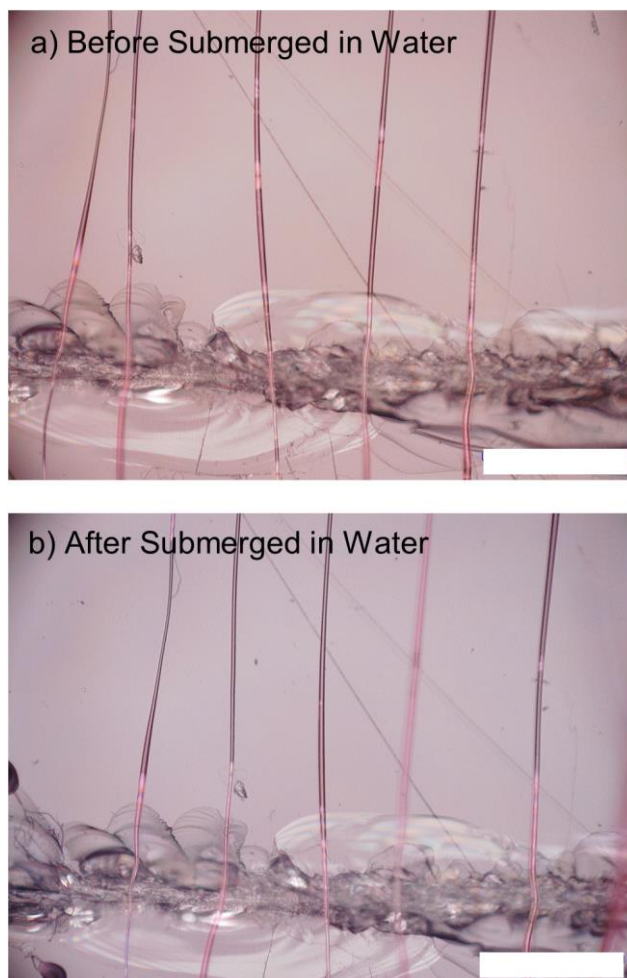

Figure S7: Optical images of crosslinked R6G-PVA fibers a) before and b) after immersion in water for 24 h. The fibers were water stable. Scale bar: 200  $\mu\text{m}$ .

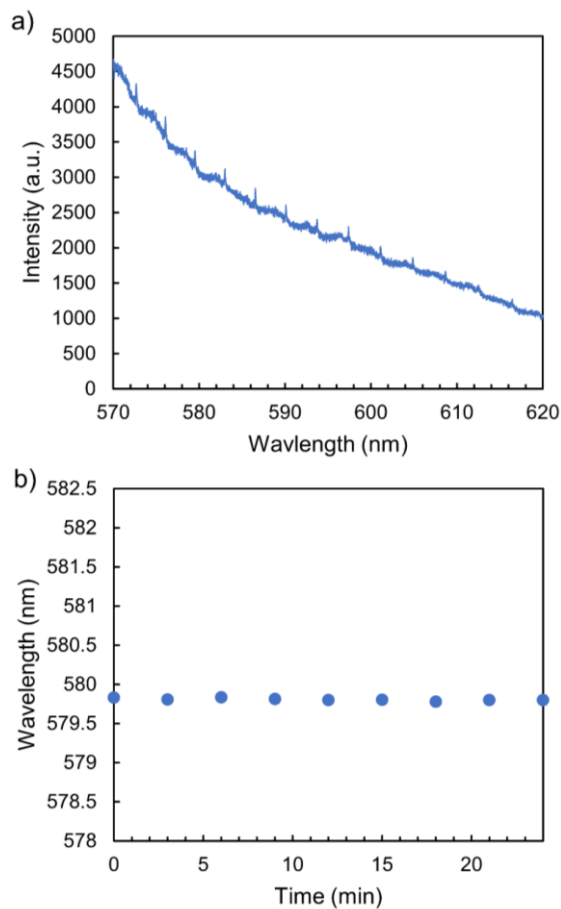

Figure S8: a) Representative fluorescence spectrum of a crosslinked R6G-PVA fiber in water. The spectrum was taken with a 50x long working distance objective under 532 nm CW illumination, using conditions similar to ethanol-water chemical sensing. The shutter was closed between measurements. b) The peak wavelength as a function of measurement time for mode near 580 nm. WGM resonance wavelength remains stable over time.

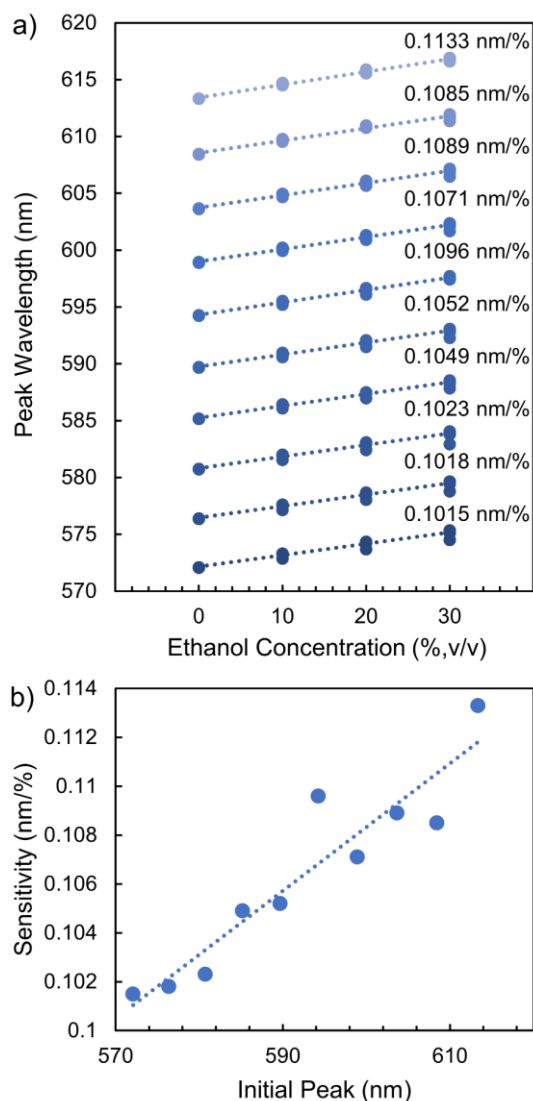

Figure S9: a) Peak emission wavelength as a function of ethanol concentration for the same 15.9  $\mu\text{m}$  fiber shown in Figure 7. b) Plot of sensitivity versus wavelength for each resonance peak. Sensor sensitivity increases for longer wavelength.

- (1) Scott, T. A. Refractive Index of Ethanol-Water Mixtures and Density and Refractive Index of Ethanol-Water-Ethyl Ether Mixtures. *J. Phys. Chem.* **1946**, 50 (5), 406–412. <https://doi.org/10.1021/j150449a003>.
